# Supplementary material for: Probing dynamic covalent chemistry in a 2D boroxine framework by in situ near-ambient pressure X-ray photoelectron spectroscopy
Source: Royal Society of Chemistry journal article supplement (doi:10.1039/d2nr04949j), 2022-12-01
Supplement: d2nr04949j1.pdf [file d2nr04949j1.pdf]

## Supporting information

### Probing dynamic covalent chemistry in a 2D boroxine framework by *in-situ* near-ambient pressure X-ray photoelectron spectroscopy

Paul Leidinger,<sup>a</sup> Mirco Panighel,<sup>b</sup> Virginia Pérez Dieste,<sup>c</sup> Ignacio J. Villar-Garcia,<sup>c</sup> Pablo Vezzoni,<sup>d</sup> Felix Haag,<sup>d</sup> Johannes Barth,<sup>d</sup> Francesco Allegretti,<sup>d</sup> Sebastian Günther,<sup>a</sup> and Laerte L. Patera <sup>\*a,e</sup>

---

<sup>a</sup> Department of Chemistry and Catalysis Research Center, Technical University of Munich, 85748 Garching (Germany).

<sup>b</sup> CNR-IOM, Laboratorio TASC, 34149 Trieste (Italy).

<sup>c</sup> CELLS-ALBA Synchrotron Radiation Facility, 08290 Cerdanyola del Valles (Spain).

<sup>d</sup> Physics Department E20, Technical University of Munich, 85748 Garching (Germany).

<sup>e</sup> Institute of Physical Chemistry, University of Innsbruck, 6020 Innsbruck (Austria). E-mail: [laerte.patera@uibk.ac.at](mailto:laerte.patera@uibk.ac.at)

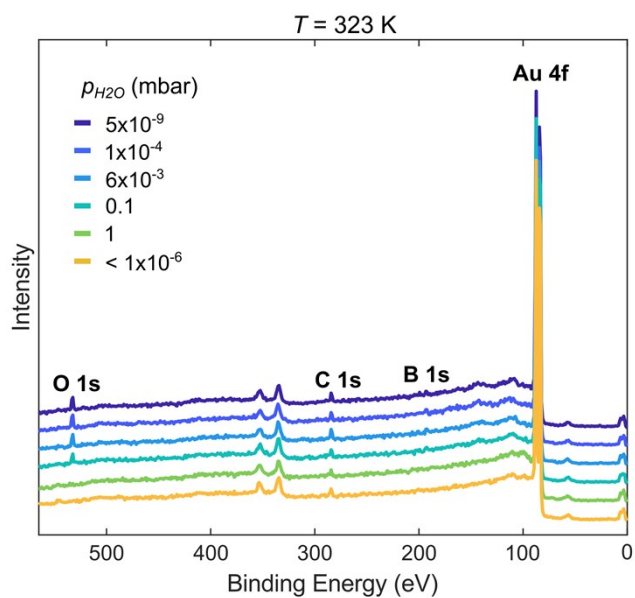

**Fig. S11.** Survey spectra acquired at  $T = 323 \text{ K}$  upon sequential increase of  $p_{\text{H}_2\text{O}}$  and after cell evacuation. Photon energy: 650 eV.

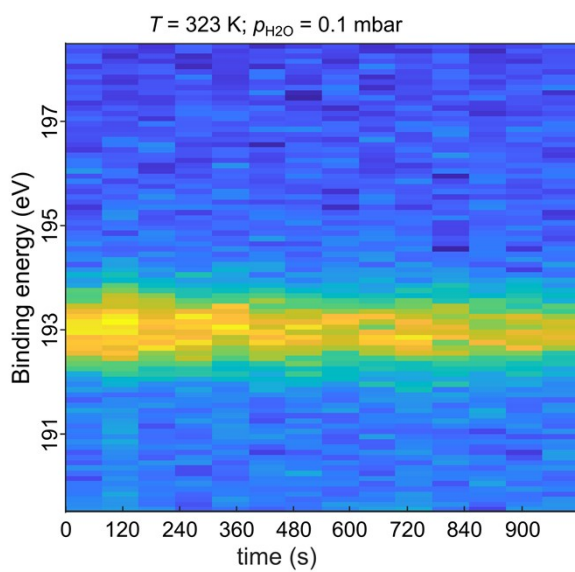

**Fig. S12.** Time-resolved B 1s spectra acquired at  $T = 323 \text{ K}$  and  $p_{\text{H}_2\text{O}} = 0.1 \text{ mbar}$ . Photon energy: 650 eV.

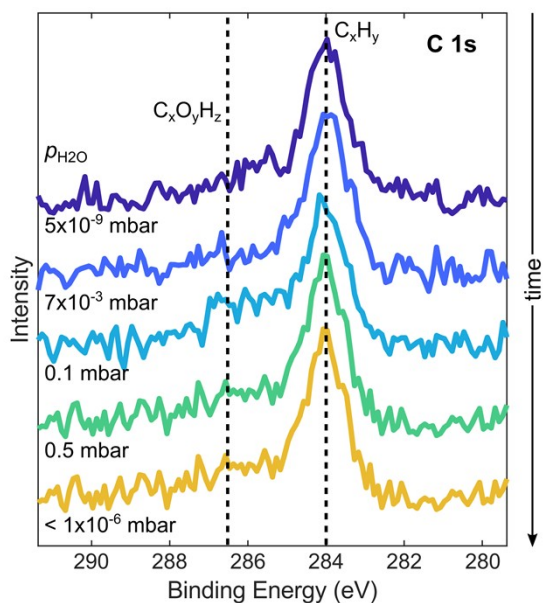

**Fig. S13.** Carbon-containing contaminations at NAP. C 1s spectra acquired at  $T = 300$  K upon sequential increase of  $p_{\text{H}_2\text{O}}$  and after cell evacuation. Photon energy: 650 eV. The intensity of hydrocarbon species ( $\text{C}_x\text{H}_y$ , 284.0 eV) is rather constant. Oxygen-containing carbon species ( $\text{C}_x\text{O}_y\text{H}_z$ ) are detected at 0.1 mbar at 286.5 eV, while their intensity diminish at 0.5 mbar.

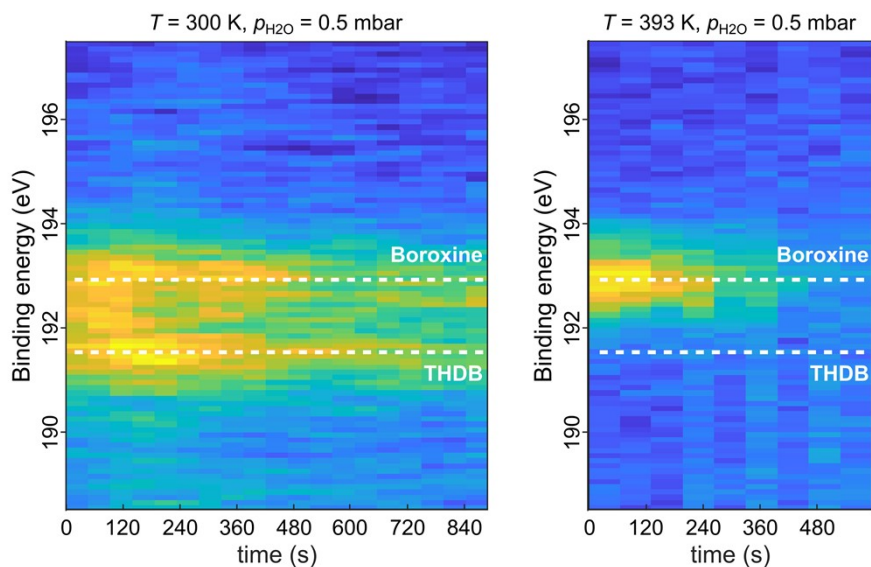

**Fig. S14.** *In-situ* NAP-XPS characterization at  $p_{\text{H}_2\text{O}} = 0.5$  mbar. Time-resolved B 1s spectra acquired at  $T = 300$  K (left) and  $T = 393$  K (right). Photon energy: 650 eV. The binding energies corresponding to boroxine and THDB are indicated.

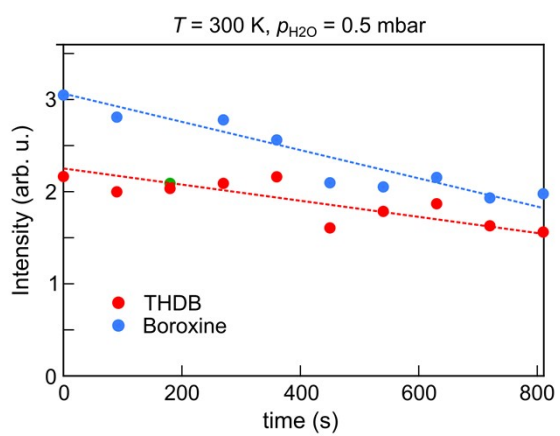

**Fig. S15.** *In-situ* NAP-XPS characterization at  $p_{\text{H}_2\text{O}} = 0.5 \text{ mbar}$ . Plot of the time-resolved B 1s spectra components: THDB (red) and boroxine (blue), with dashed lines as a guide to the eye.
